# Supplementary material for: Interleukin-26 activates macrophages and facilitates killing of Mycobacterium tuberculosis
Source: PubMed Central journal article supplement (PMC7558018; doi:10.1038/s41598-020-73989-y), 2020-10-14
Supplement: 41598_2020_73989_MOESM1_ESM.pdf [file 41598_2020_73989_MOESM1_ESM.pdf]

## Supplemental information

### Interleukin-26 activates macrophages and facilitates killing of *Mycobacterium tuberculosis*

Heike C. Hawerkamp<sup>1</sup>, Lasse van Geelen<sup>2</sup>, Jan Korte<sup>2</sup>, Jeremy Di Domizio<sup>3</sup>, Marc Swidergall<sup>4</sup>, Afaque A. Momin<sup>5</sup>, Francisco J. Guzmán-Vega<sup>5</sup>, Stefan T. Arold<sup>5</sup>, Joachim Ernst<sup>4</sup>, Michel Gilliet<sup>3</sup>, Rainer Kalscheuer<sup>2</sup>, Bernhard Homey<sup>1</sup>, Stephan Meller<sup>1</sup>

- 1 Department of Dermatology, Medical Faculty, Heinrich-Heine-University Düsseldorf, Germany
- 2 Department of Pharmaceutical Biology and Biotechnology, Heinrich-Heine-University, Düsseldorf, Germany
- 3 Department of Dermatology, University Hospital CHUV, Lausanne, Switzerland
- 4 Department of Biology, Molecular Mycology, Heinrich-Heine-University, Düsseldorf, Germany
- 5 King Abdullah University of Science and Technology (KAUST), Computational Bioscience Research Center (CBRC), Division of Biological and Environmental Sciences and Engineering (BESE), Thuwal, Saudi Arabia



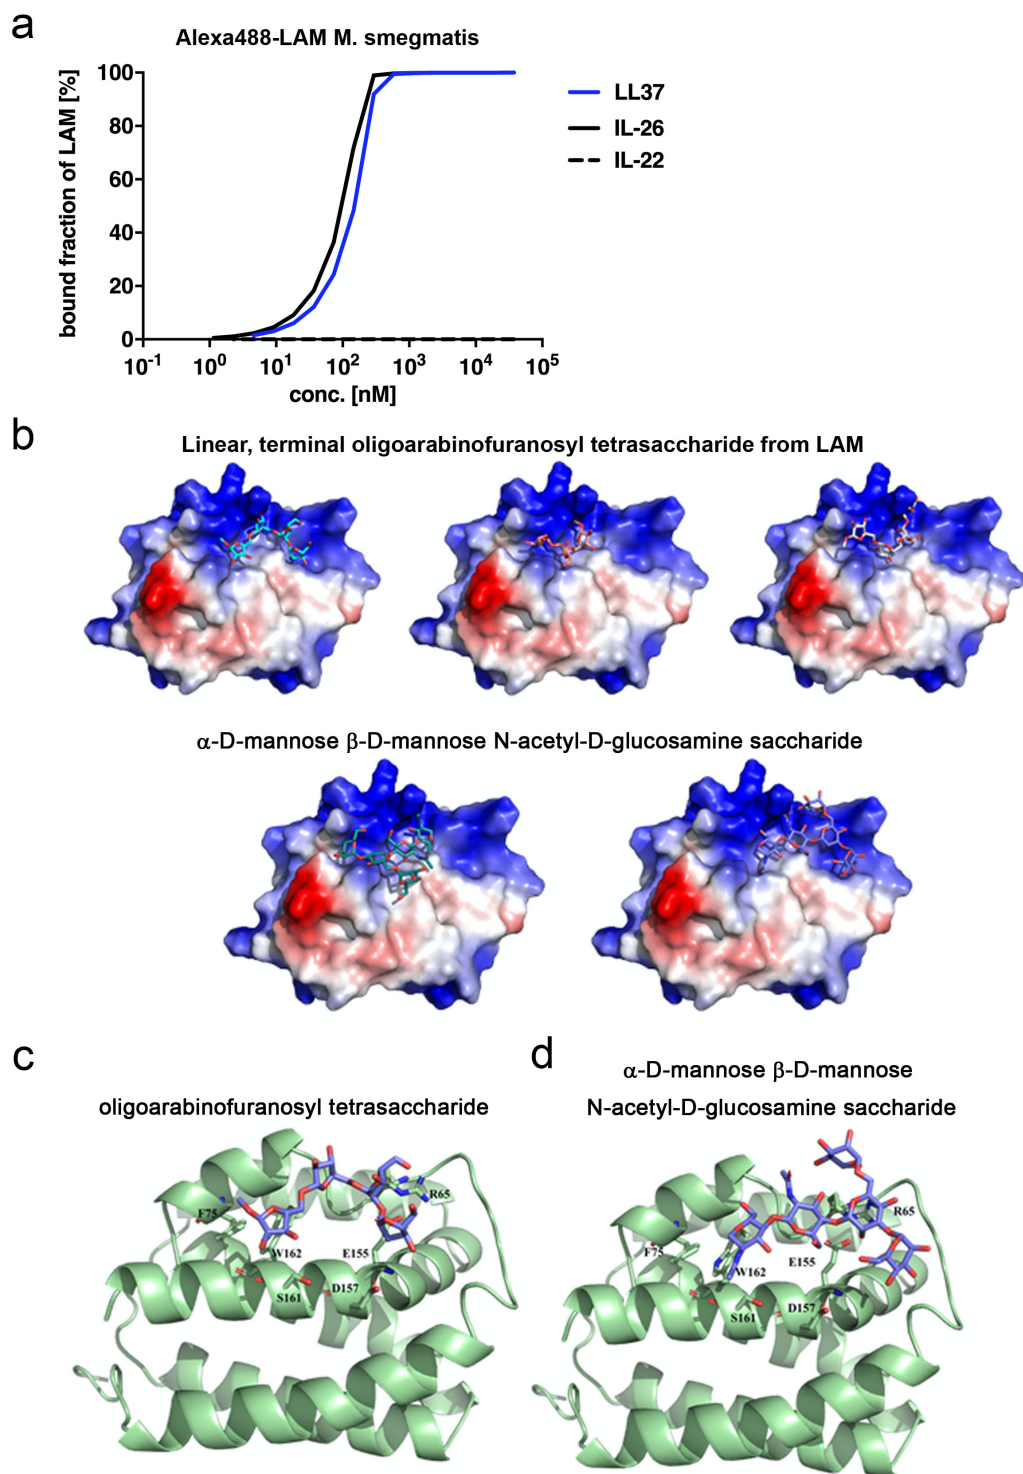

Supplemental Figure 2: (a) Binding of IL-26 to mycobacterial LAM from *M. smegmatis* was investigated using microscale thermophoresis (MST). The percentages of bound fractions of LAM to different IL-26, IL-22 and LL37 concentrations are displayed graphically. (b) Upper panels; Best docked poses of IL-26 model represented in surface electrostatics with linear, terminal oligoarabinofuranosyl tetrasaccharide from LAM shown in sticks and lower panels; Best docked poses of IL-26 model represented in surface electrostatics with  $\alpha$ -D-mannose  $\beta$ -D-mannose N-acetyl-D-glucosamine saccharide. (c) The best scored docked pose of IL-26 model represented in cartoon with linear, terminal oligoarabinofuranosyl tetrasaccharide from LAM represented in sticks and (d) best scored docked pose of IL-26 model represented in cartoon with  $\alpha$ -D-mannose  $\beta$ -D-mannose N-acetyl-D-glucosamine saccharide. The interaction residues are labeled appropriately.

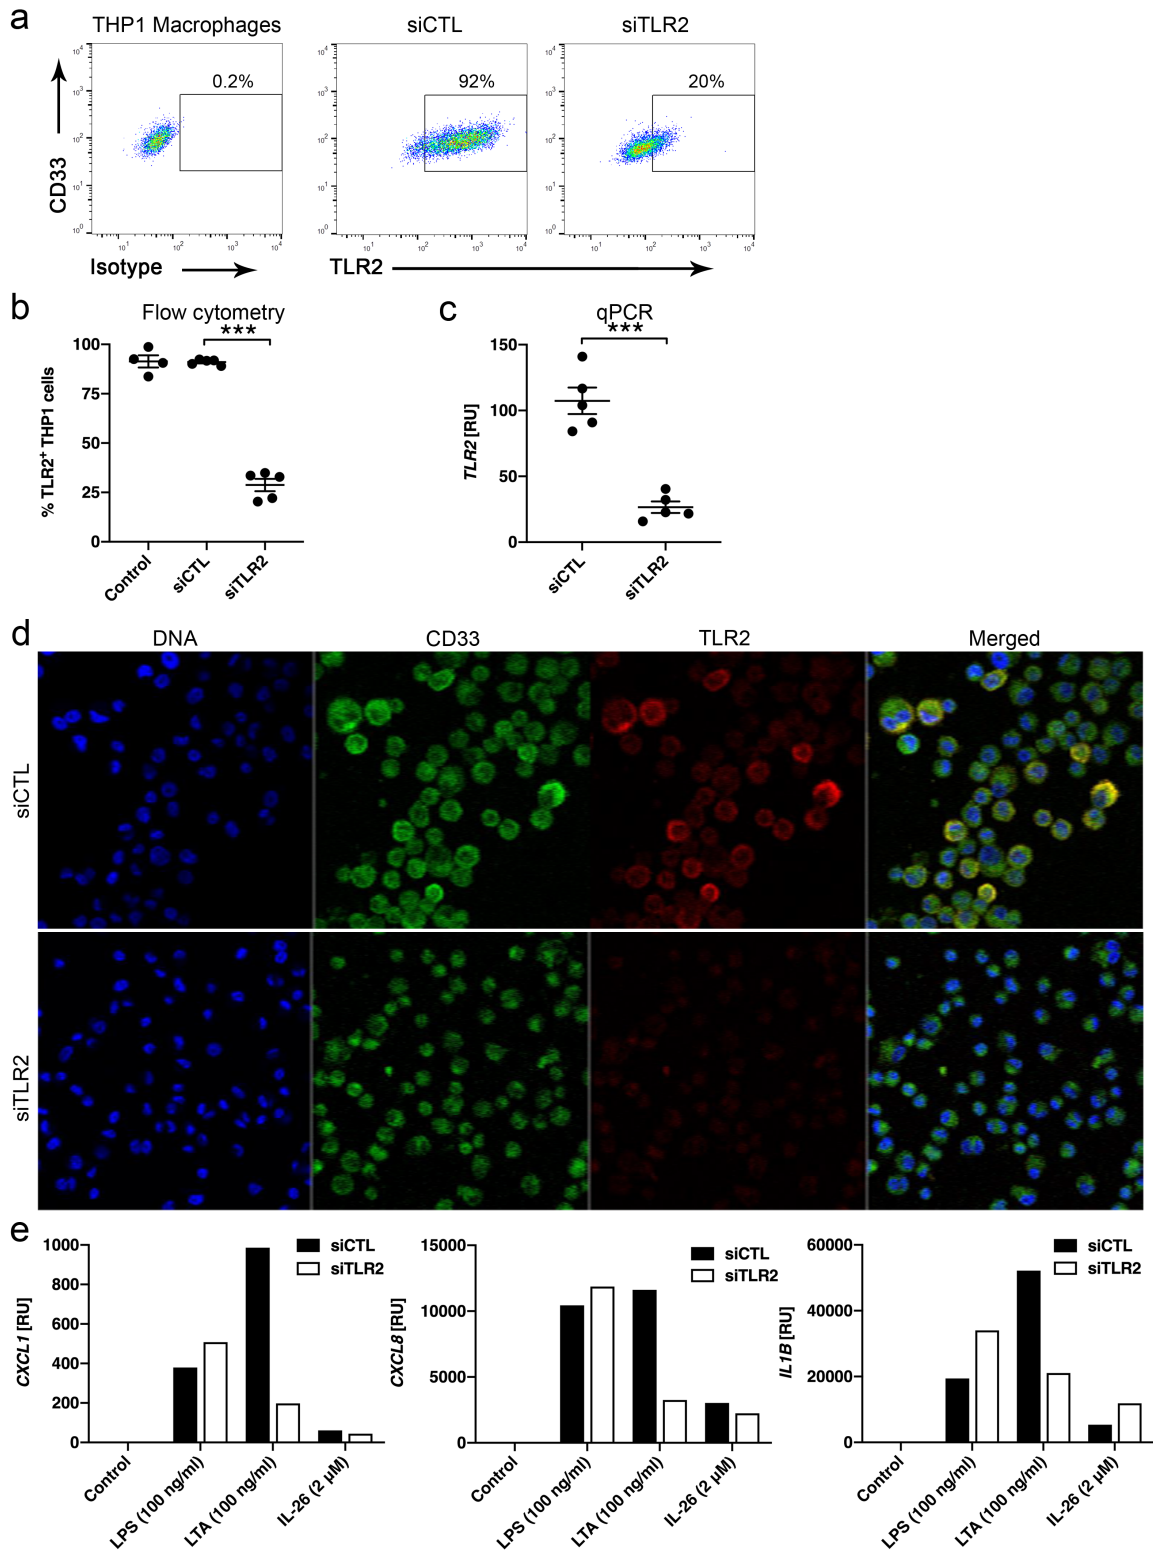

Supplemental Figure 3: **Efficient TLR2 knockdown in THP1 macrophages.** (a) TLR2 surface expression is drastically reduced in siTLR2-treated THP1 macrophages as shown in a representative flow cytometry blot. Both TLR2 protein (b, n = 4 - 5) and TLR2 gene expression (c, n = 5) is inhibited by treated with siTLR2. (d) The reduction in TLR2 surface expression is also visualized using confocal microscopy. (e) TLR2 knockdown leads to strong decrease in *CXCL1*, *CXCL8* and *IL1B* gene expression in THP1 macrophages detected via qPCR (n=1). qPCR-values are shown as relative units compared to 18S RNA. Data are presented as mean + SEM. Statistical analysis was done using Mann Whitney U test (\*\*\*) equals p<0.001).
